# Supplementary material
Source: MDPI journal article supplement (https://www.mdpi.com/2673-4591/56/1/202)
Supplement: s1 [file s1]

## Supplementary Materials

### An Electrode Based on the Manganese Dioxide Nanorods and Hexadecylpyridinium Bromide for the Rosmarinic Acid Voltammetric Assay

Guzel Ziyatdinova

**Table S1.** Comparison of rosmarinic acid analytical characteristics on various electrodes.

| Electrode                                                                                                                                                                                                                | Method | Detection limit, M   | Linear dynamic range, M                                                                     | Ref.      |
|--------------------------------------------------------------------------------------------------------------------------------------------------------------------------------------------------------------------------|--------|----------------------|---------------------------------------------------------------------------------------------|-----------|
| Carbon paste electrode/Carbon nanotubes dispersed in chitosan/ DNA                                                                                                                                                       | SWV*   | $1.4 \times 10^{-8}$ | $4.0 \times 10^{-8}$ – $1.5 \times 10^{-6}$                                                 | [3]       |
| Carbon nanotube paste electrode with <i>n</i> -octyl-pyridinium hexafluorophosphate                                                                                                                                      | DPV**  | $1.5 \times 10^{-8}$ | $0.0$ – $6.8 \times 10^{-4}$                                                                | [4]       |
| Carbon paste electrode with [Fe <sup>III</sup> Z-n <sup>II</sup> (μ-OH)(2-[bis(2-pyridylmethyl)aminomethyl]-6-[(2-hydroxy-5-methylbenzyl)(2-pyridyl-methyl)aminomethyl]-4-methylphenol)](ClO <sub>4</sub> ) <sub>2</sub> | SWV    | $2.3 \times 10^{-6}$ | $2.98 \times 10^{-5}$ – $3.83 \times 10^{-4}$                                               | [5]       |
| Glassy carbon electrode/poly( <i>o</i> -phenylenediamine)/Pt nanoparticles                                                                                                                                               | CA***  | $5 \times 10^{-7}$   | $(1-55) \times 10^{-6}$                                                                     | [6]       |
| Carbon paste electrode/MMIP**** Fe <sub>3</sub> O <sub>4</sub> @SiO <sub>2</sub> @NH <sub>2</sub> nanoparticles                                                                                                          | DPV    | $8.5 \times 10^{-8}$ | $1 \times 10^{-7}$ – $1 \times 10^{-4}$ and $1 \times 10^{-4}$ – $5 \times 10^{-4}$         | [7]       |
| GCE/MnO <sub>2</sub> nanorods–hexadecylpyridinium bromide                                                                                                                                                                | DPV    | $9.7 \times 10^{-9}$ | $2.5 \times 10^{-8}$ – $1.0 \times 10^{-6}$ and $1.0 \times 10^{-6}$ – $1.0 \times 10^{-5}$ | This work |

\* Square-wave voltammetry. \*\* Differential pulse voltammetry. \*\*\* Chronoamperometry.

\*\*\*\* Magnetic functionalized molecularly imprinted polymer.
